# Supplementary material
Source: PubMed Central journal article supplement (PMC2711440)
Supplement: NIHMS109913-supplement-supp.pdf [file NIHMS109913-supplement-supp.pdf]

Table S1. Effects of MTS modification on receptors incorporating NR1wt and the indicated NR2 mutant

| NR2 mutant         | Relative current (mean $\pm$ s.d.) |                       |                        |
|--------------------|------------------------------------|-----------------------|------------------------|
|                    | post MTSEA                         | post MTSET            | post MTS-PtrEA         |
| <b>NR2B mutant</b> |                                    |                       |                        |
| H127C              | 1.13 $\pm$ 0.03 (n=5)              | 1.29 $\pm$ 0.06 (n=5) | 1.58 $\pm$ 0.10 (n=8)  |
| H127A              | 0.93 $\pm$ 0.01 (n=7)              | 0.84 $\pm$ 0.03 (n=5) | 0.74 $\pm$ 0.01 (n=5)  |
| Y282C              | 2.1 $\pm$ 0.1 (n=10)               | 4.4 $\pm$ 0.6 (n=10)  | 5.5 $\pm$ 1.0 (n=33)   |
| Y282S              | 0.91 $\pm$ 0.02 (n=4)              | 0.92 $\pm$ 0.03 (n=4) | 0.92 $\pm$ 0.02 (n=4)  |
| <b>NR2A mutant</b> |                                    |                       |                        |
| H128C              | 0.74 $\pm$ 0.01 (n=6)              | 0.83 $\pm$ 0.02 (n=8) | 0.91 $\pm$ 0.10 (n=10) |
| H128S              | 0.80 $\pm$ 0.01 (n=4)              | 0.76 $\pm$ 0.01 (n=4) | 0.84 $\pm$ 0.07 (n=6)  |
| Y281C              | 1.02 $\pm$ 0.02 (n=12)             | 1.09 $\pm$ 0.04 (n=6) | 0.95 $\pm$ 0.03 (n=6)  |
| Y281A              | 0.60 $\pm$ 0.06 (n=12)             | 0.58 $\pm$ 0.04 (n=6) | 0.58 $\pm$ 0.03 (n=5)  |

Table S2. pH sensitivity of receptors incorporating NR1wt and the indicated NR2 construct

| NR2 construct   | pH <sub>IC50</sub> |
|-----------------|--------------------|
| NR2Awt          | 6.93 ± 0.02 (n=9)  |
| NR2Bwt          | 7.50 ± 0.03 (n=5)  |
| NR2A-ΔNTD       | 7.11 ± 0.09 (n=9)  |
| NR2B-ΔNTD       | 7.14 ± 0.03 (n=6)  |
| NR2A-(2B NTD+L) | 7.26 ± 0.03 (n=4)  |
| NR2B-(2A NTD+L) | 7.02 ± 0.02 (n=4)  |
| NR2Dwt          | 7.52 ± 0.03 (n=10) |
| NR2D-(2A NTD+L) | 7.13 ± 0.01 (n=5)  |

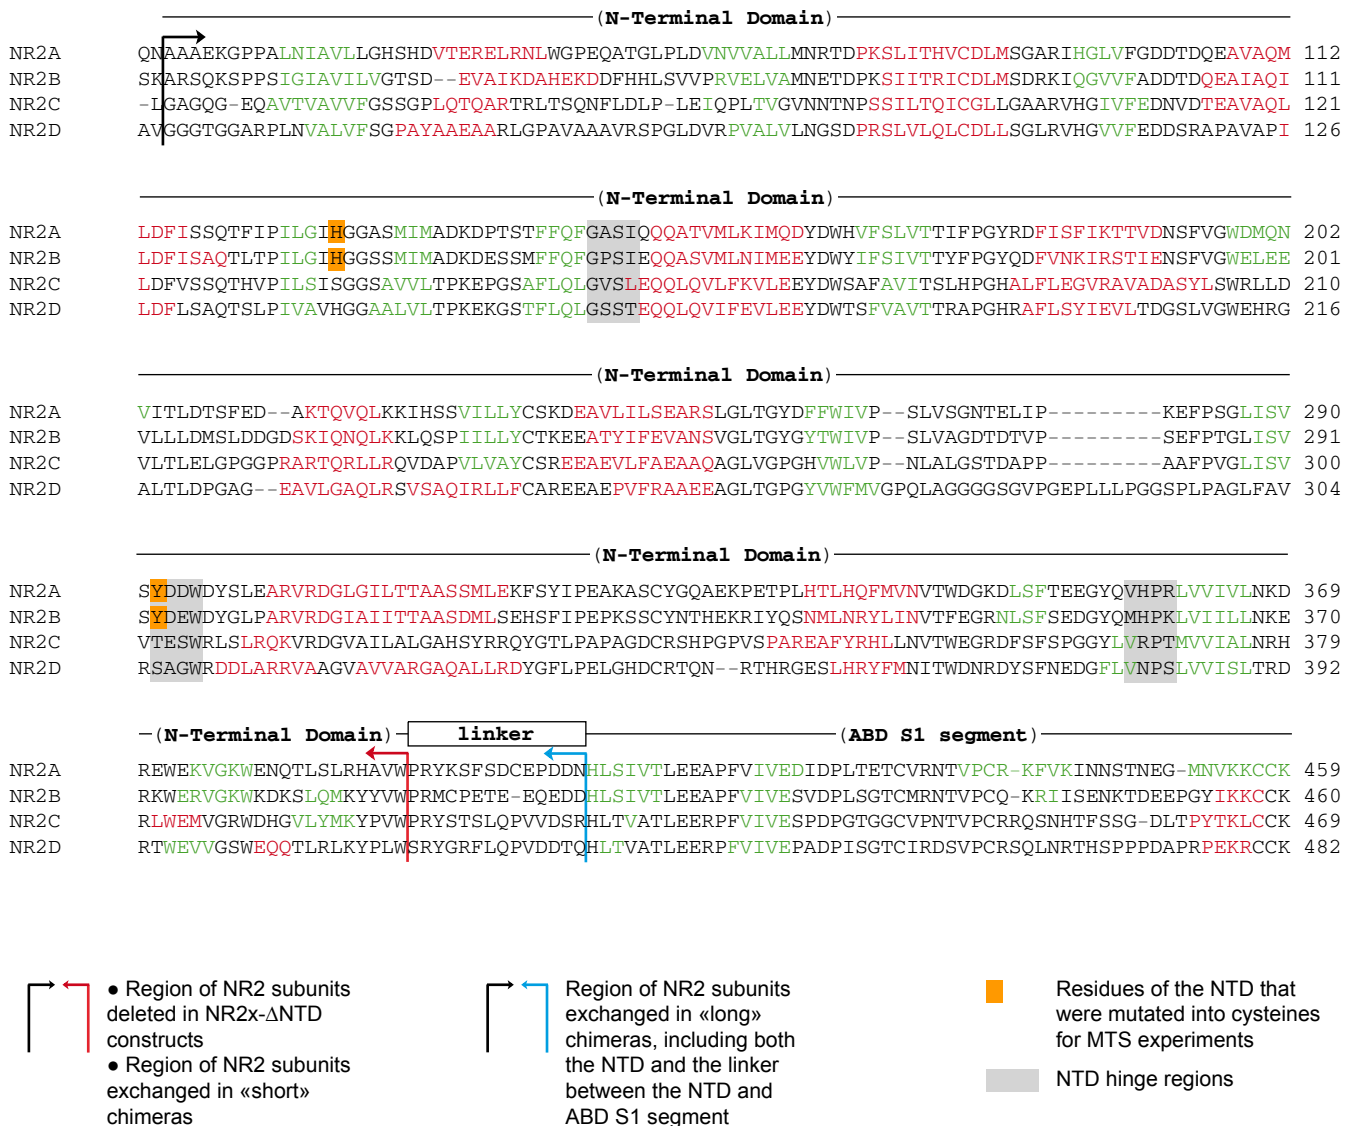

**Figure S1. Sequence alignment of the NTD+linker region of NR2A-D subunits**

The indicated  $\alpha$ -helices (red) and  $\beta$ -strands (green) of NR2 subunits were predicted as described in ref<sup>25</sup>.

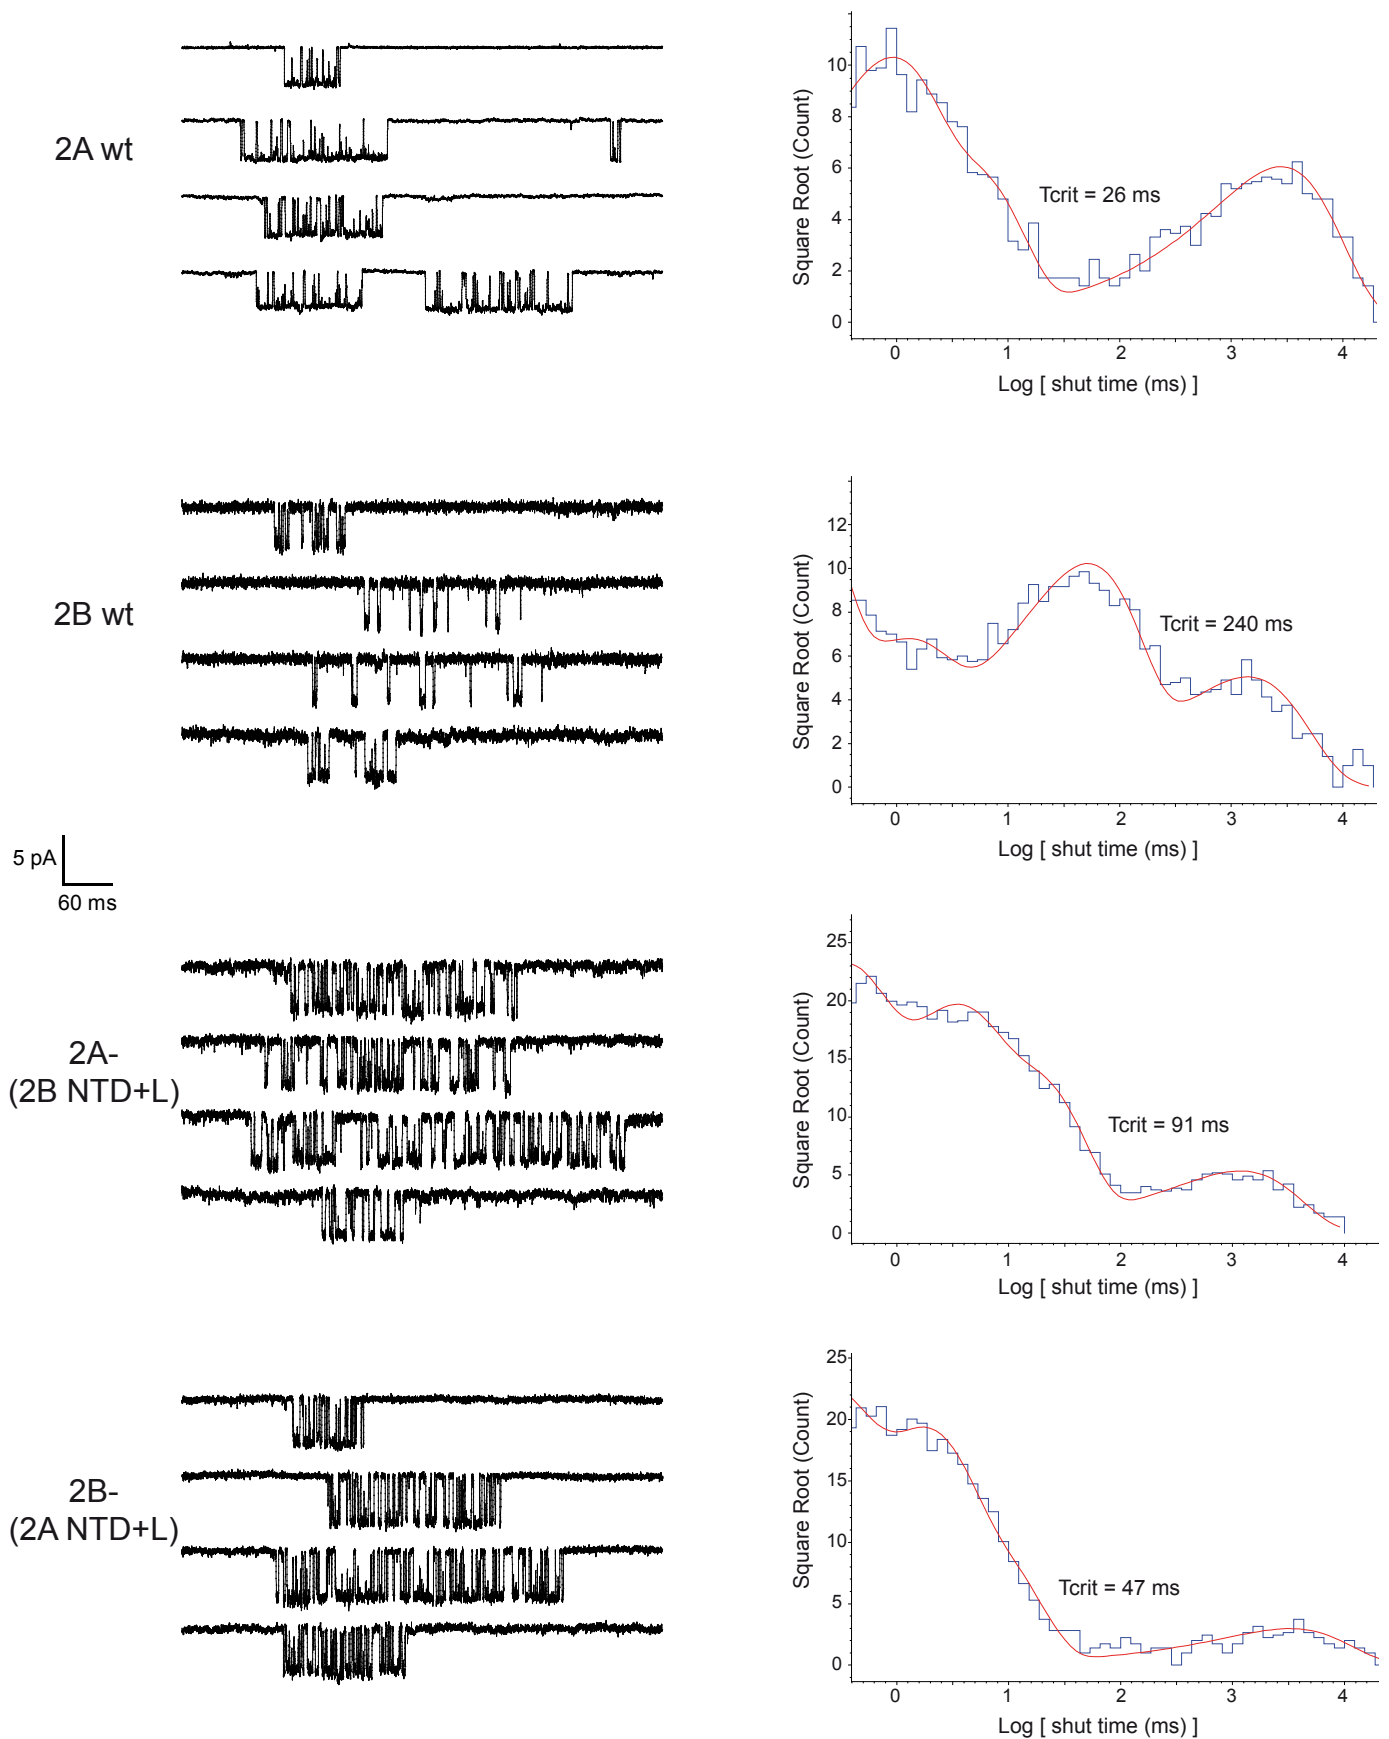

**Figure S2. Effect of NR2A/B NTD+L chimeras on single-channel activity**

Representative bursts of openings (left) and shut-time distribution histograms (right) from outside-out patches expressing either NR1wt/NR2Awt, NR1wt/NR2Bwt, NR1wt/NR2A-(2B NTD+L) and NR1wt/NR2B-(2A NTD+L). The value of  $T_{crit}$  used to define bursts is indicated for each histogram.

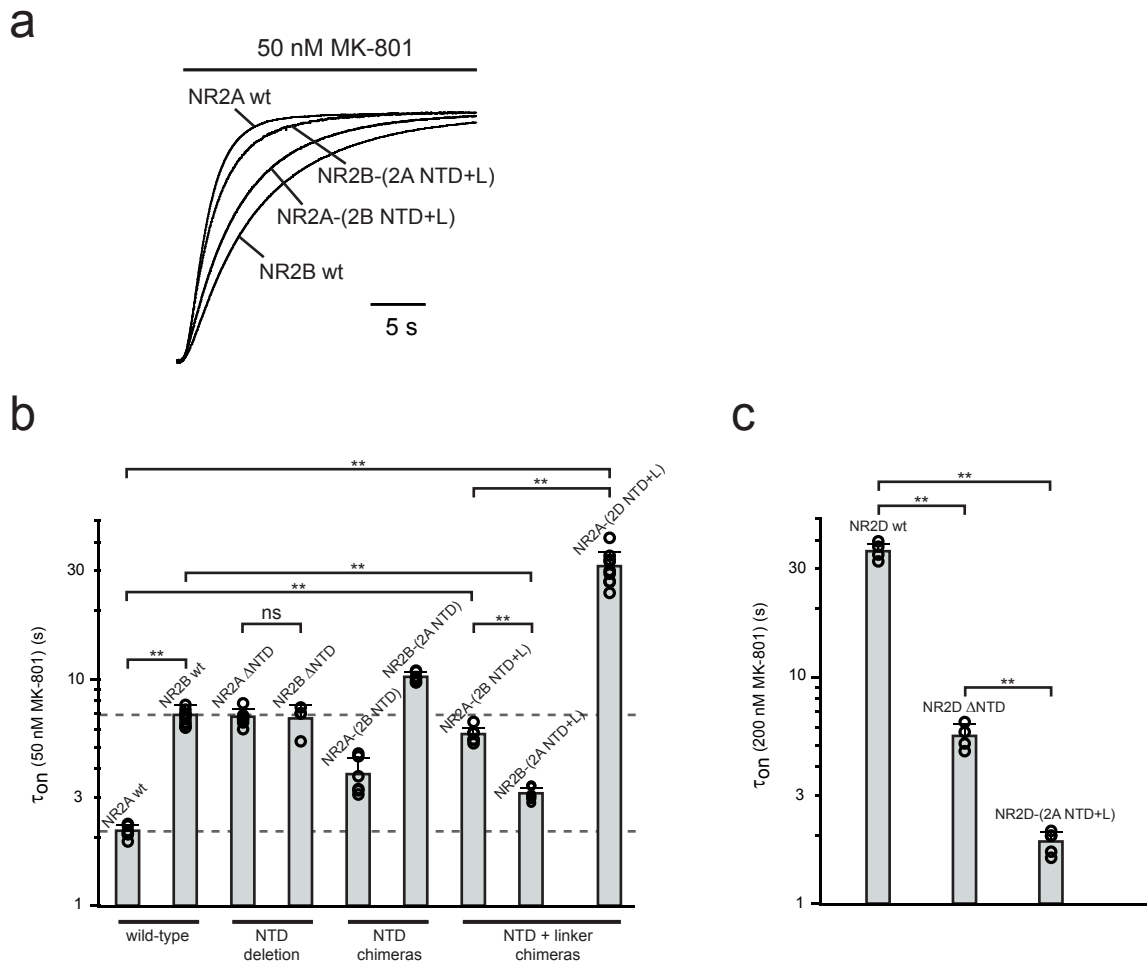

**Figure S3. Kinetics of MK-801 inhibition reveal that NMDAR Po heterogeneity is controlled by the NR2 NTD+linker region**

**a** Kinetics of inhibition by 50 nM MK-801 of receptors incorporating NR1wt together with NR2Awt ( $\tau_{on}$  = 2.0 s), NR2Bwt (6.9 s), NR2A-(2B NTD+L) (5.1 s) or NR2B-(2A NTD+L) (2.8 s). **b** Bar graph showing the time constant of inhibition by 50 nM MK-801 of receptors incorporating NR1wt together with NR2Awt ( $\tau_{on}$  = 2.1 +/- 0.1 s [n=6]), NR2Bwt (6.9 +/- 0.7 s [n=10]), NR2A- $\Delta$ NTD (6.8 +/- 0.6 s [n=6]), NR2B- $\Delta$ NTD (6.7 +/- 1.0 s [n=4]), NR2A-(2B NTD) (3.8 +/- 0.3 s [n=6]), NR2B-(2A NTD) (10.2 +/- 0.5 s [n=6]), NR2A-(2B NTD+L) (5.7 +/- 0.4 s [n=6]), NR2B-(2A NTD+L) (3.1 +/- 0.2 [n=9]) or NR2A-(2D NTD+L) (31.4 +/- 4.9 s [n=10]) (\*\* $p$ <0.001). **c** Bar graph showing the time constant of inhibition by 200 nM MK-801 of receptors incorporating NR1wt together with NR2Dwt (36 +/- 3 s [n=5]), NR2D- $\Delta$ NTD (5.5 +/- 0.7 s [n=6]) or NR2D-(2A NTD+L) (1.9 +/- 0.2 [n=5]). Error bar represent s.d.

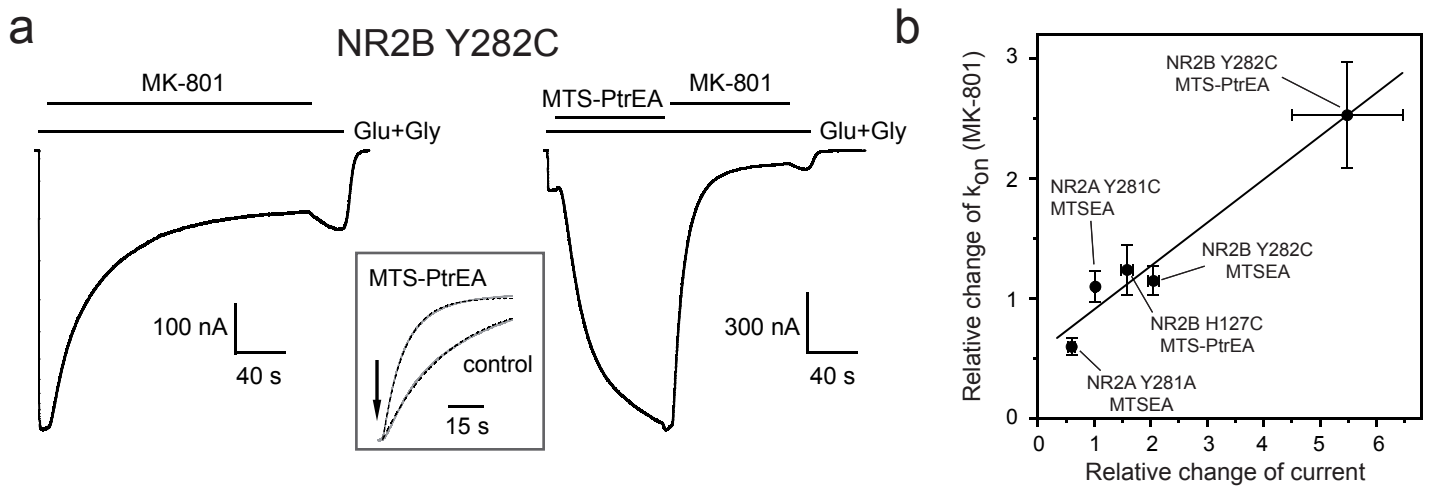

**Figure S4. Locking open the NR2-NTD increases the onset of MK-801 inhibition**

**a** Recordings showing the inhibition by 50 nM MK-801 of NR1wt/NR2B-Y282C receptors in the presence of 100  $\mu$ M glutamate and 100  $\mu$ M glycine before (left panel) and after (right panel) modification by 0.2 mM MTS-PtrEA. *Inset*: onsets of MK-801 inhibition shown in panel a were fitted with a single exponential ( $\tau_{on} = 9.7$  s before and 30 s after MTS-PtrEA). **b** The MTS-induced relative change of the MK-801 on-rate is plotted versus the MTS-induced relative change of the current for NR1wt/NR2A-Y281A (0.60  $\pm$  0.07 [n=4] vs 0.60  $\pm$  0.02 [n=12] with MTSEA, respectively), NR1wt/NR2A-Y281C (1.10  $\pm$  0.13 [n=4] vs 1.02  $\pm$  0.06 [n=12] with MTSEA, respectively), NR1wt/NR2B-H127C (1.24  $\pm$  0.21 [n=4] vs 1.58  $\pm$  0.10 [n=8] with MTS-PtrEA, respectively) and NR1wt/NR2B-Y282C (1.15  $\pm$  0.12 [n=4] vs 2.1  $\pm$  0.1 [n=9] with MTSEA, respectively; and 2.5  $\pm$  0.4 [n=4] vs 5.5  $\pm$  1.0 [n=33] with MTS-PtrEA, respectively). The line represents a linear regression fit of the data points. The R value of the fit is 0.98. Error bars represent s.d.

**a**

NR2B Y282C

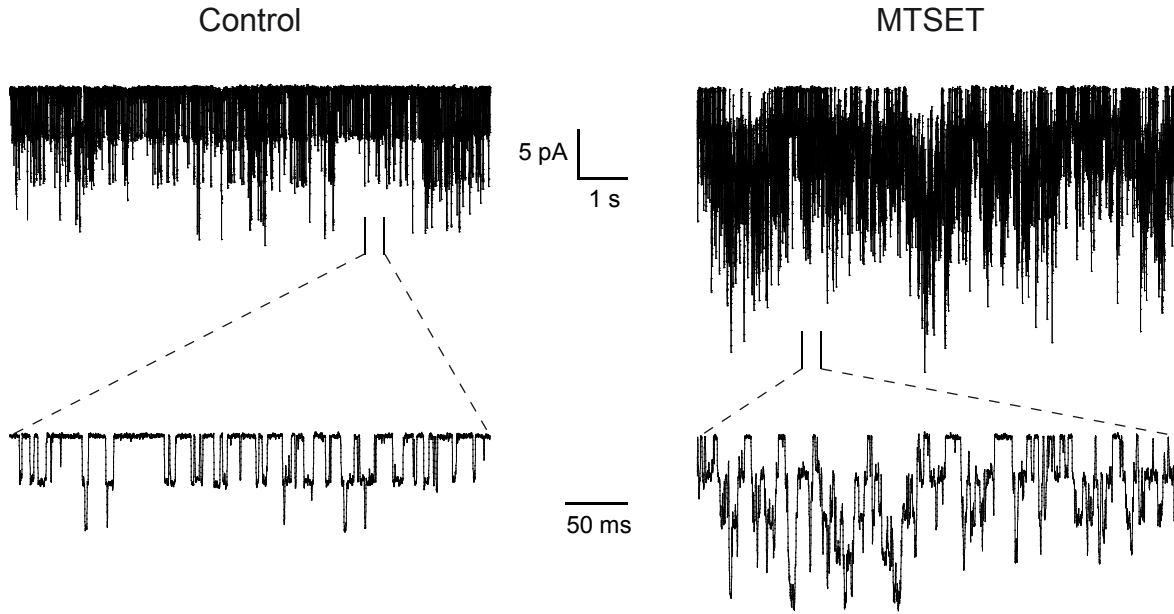**b**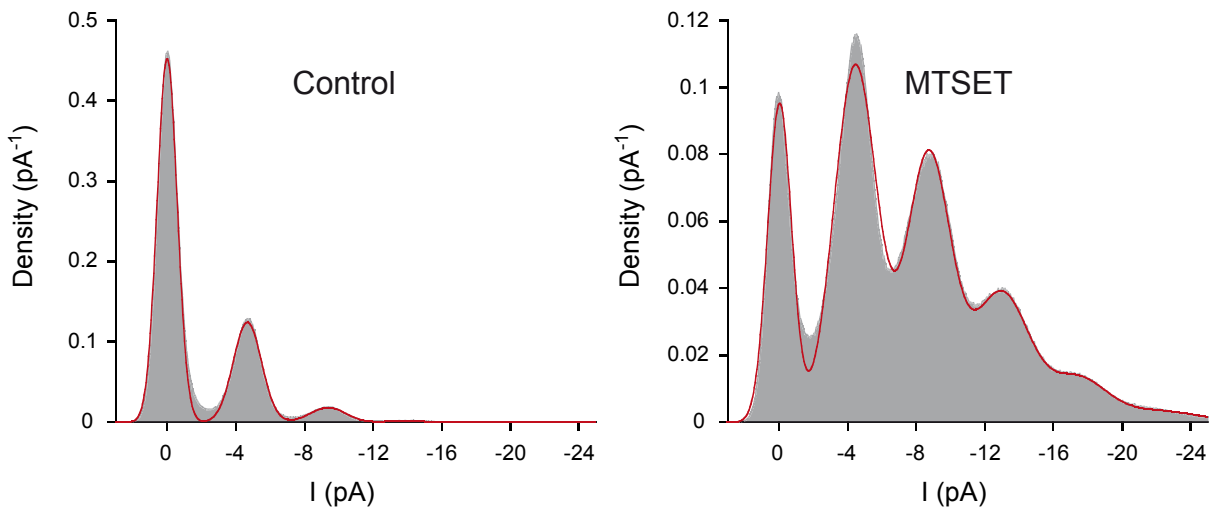**Figure S5. Locking open the NR2-NTD increases single-channel activity**

**a** Single-channel recordings of an outside-out patch from a HEK cell expressing NR1wt/NR2B-Y282C receptors, in the presence of 100  $\mu\text{M}$  glutamate and 100  $\mu\text{M}$  glycine, before (left panel) and during (right panel) application of 0.2 mM MTSET. Bottom traces display time-expanded views. **b** All-points amplitude histograms from the patch recorded in **a**. Data (gray filling) were fitted with multiple gaussian components (red lines), amplitude of which enabled the calculation of  $N \cdot P_o$  before and during MTSET application. Similar results were obtained with 3 patches, yielding a mean potentiation of  $P_o$  by MTSET of  $3.4 \pm 0.5$  (s.e.m.). Data were filtered at 5kHz for analysis and at 1 kHz for display.

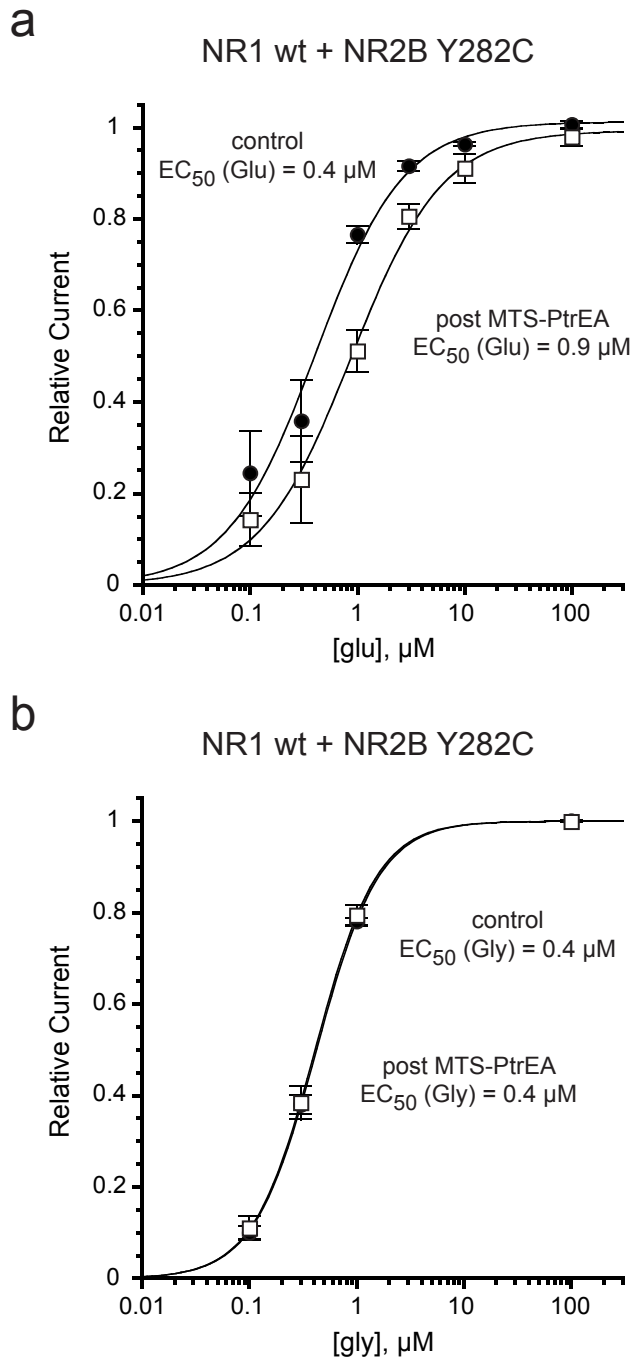

**Figure S6. Effect of MTS modification of NR1wt/NR2B-Y282C receptors on glutamate and glycine sensitivities**

**a** Glutamate dose-response curves of NR1wt/NR2B-Y282C receptors in the presence of 100 μM glycine before ( $EC_{50} = 0.38 \mu\text{M}$ ,  $n_H = 1.2$  [ $n = 9$ ]; black-filled circles) and after ( $EC_{50} = 0.9 \mu\text{M}$ ,  $n_H = 1.0$  [ $n = 9$ ]; open squares) modification by 0.2 mM MTS-PtrEA. **b** Glycine dose-response curves of NR1wt/NR2B-Y282C receptors in the presence of 100 μM glutamate before ( $EC_{50} = 0.4 \mu\text{M}$ ,  $n_H = 1.5$  [ $n = 4$ ]; black-filled circles) and after ( $EC_{50} = 0.4 \mu\text{M}$ ,  $n_H = 1.5$  [ $n = 9$ ]; open squares) modification by 0.2 mM MTS-PtrEA. Error bars represent s.d.



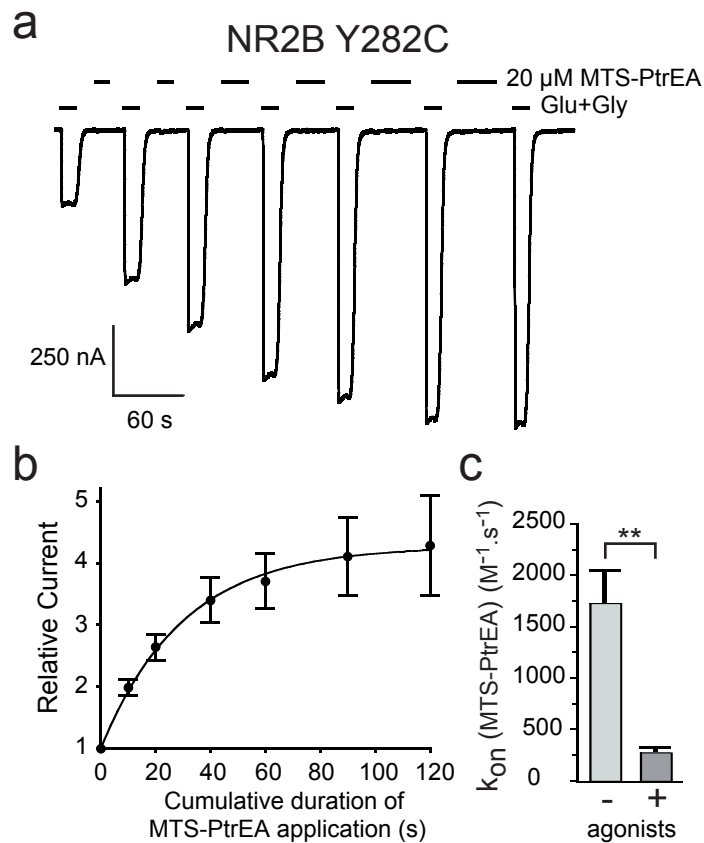

**Figure S7. MTS-PtrEA modification rate of NR1wt/NR2B-Y282C receptors is faster in the absence of agonists than in their presence**

**a** Recordings showing the modification of NR1wt/NR2B-Y282C receptors by 20  $\mu$ M MTS-PtrEA in the absence of glutamate and glycine. **b** The onsets of MTS-PtrEA modification were fitted with a single exponential ( $\tau_{on} = 30 \pm 6$  s, [n=5]). **c** Mean reaction rate of MTS-PtrEA modification at NR1wt/NR2B-Y282C in the absence or in the presence of 100  $\mu$ M glutamate and 100  $\mu$ M glycine ( $1700 \pm 300 M^{-1}.s^{-1}$  [n=5] and  $280 \pm 50 M^{-1}.s^{-1}$  [n=17], respectively) (\*\* $p < 0.001$ , Student's t-test). Error bars represent s.d.

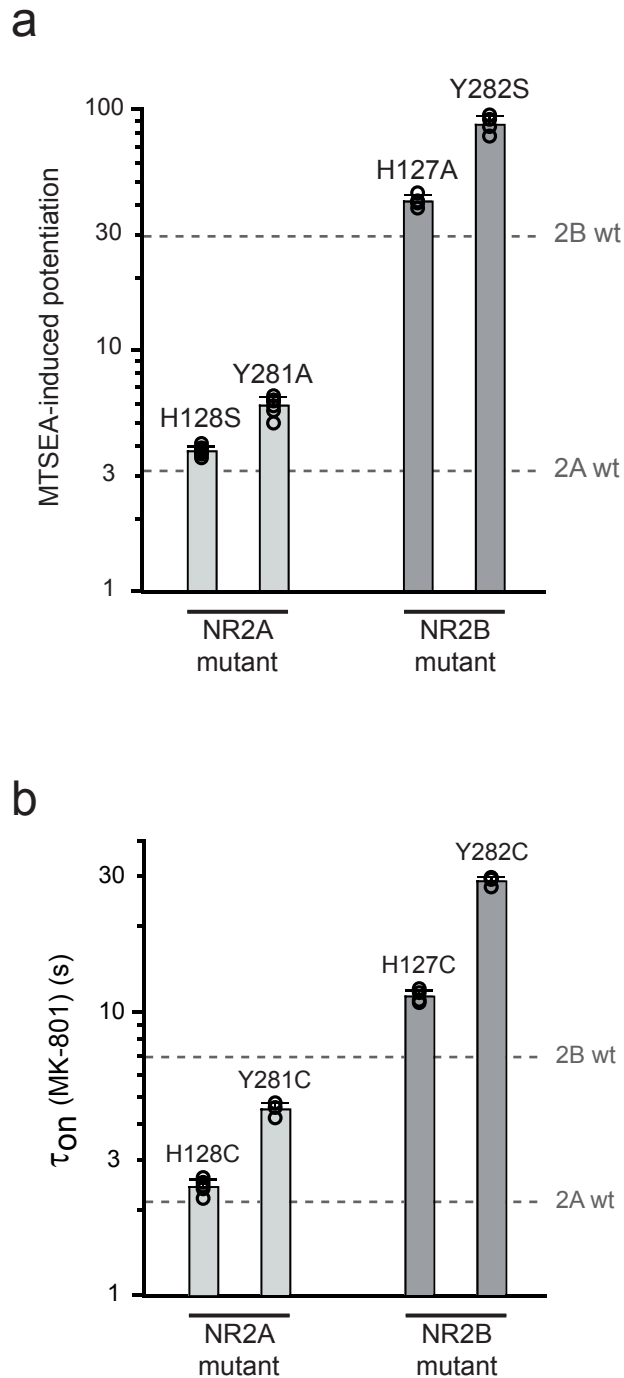

**Figure S8. Effect of NR2-NTD mutations on receptor activity**

**a** Bar graph showing the MTSEA-induced potentiations of receptors incorporating NR1-A652C together with NR2A-H128S ( $3.8 \pm 0.2$ , [n=7]), NR2A-Y281A ( $6.0 \pm 0.5$ , [n=7]), NR2B-H127A ( $42 \pm 2$ , [n=5]) or NR2B-Y282S ( $87 \pm 7$ , [n=3]). **b** Bar graph showing the onset of inhibition by 50 nM MK-801 of receptors incorporating NR1wt together with NR2A-H128C ( $2.4 \pm 0.2$  s, [n=5]), NR2A-Y281C ( $4.6 \pm 0.2$  s, [n=4]), NR2B-H127C ( $11.4 \pm 0.5$  s, [n=4]) or NR2B-Y282C ( $29.1 \pm 0.9$  s, [n=4]). Error bars represent s.d.

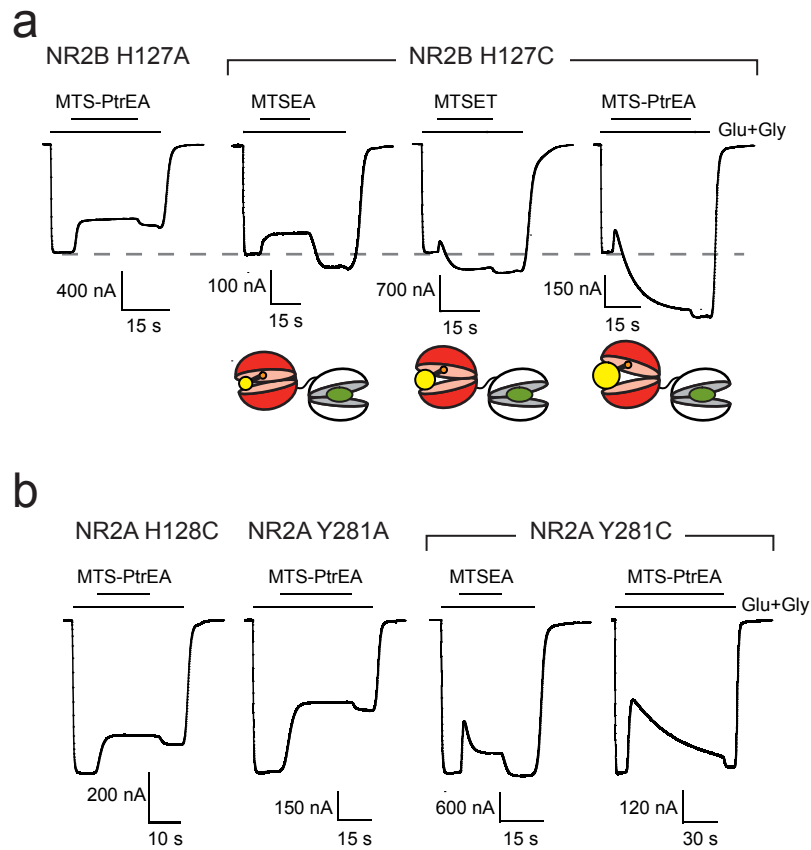

**Figure S9. Effect of MTS modification at NR2B-H127, NR2A-Y281 and NR2A-H128 mutated receptors**

**a** Recordings from NR1wt/NR2B-H127C and NR1wt/NR2B-H127A receptors during treatment by 0.2 mM of the indicated MTS compounds. **b** Recordings from NR1wt/NR2A-H128C, NR1wt/NR2A-Y281A and NR1wt/NR2A-Y281C receptors during treatment by 0.2 mM of the indicated MTS compound. Note that the MTS-potentiating effects are specific to the cysteine mutation introduced, since no potentiation were observed with the non-reactive serine or alanine control mutants, but rather an inhibition (likely due to the modification of an endogenous cysteine).
